# Supplementary material for: Polymerization of trimethylene carbonates using organic phosphoric acids
Source: Royal Society of Chemistry journal article supplement (doi:10.1039/c6py01210h), 2016-01-01
Supplement: c6py01210h1.pdf [file c6py01210h1.pdf]

## Supporting Information

### **Polymerization of Trimethylene Carbonates Using Organic Phosphoric**

#### **Acids**

Jiaqi Liu, Saide Cui, Zhenjiang Li, Songquan Xu, Jiayi Xu, Xianfu Pan, Yaya Liu, He Dong,  
Herui Sun, Kai Guo\*

State Key Laboratory of Materials-Oriented Chemical Engineering, College of  
Biotechnology and Pharmaceutical Engineering, Nanjing Tech University, 30 Puzhu  
Road South, Nanjing 211816, China.

E-mail: guok@njtech.edu.cn; zjli@njtech.edu.cn.

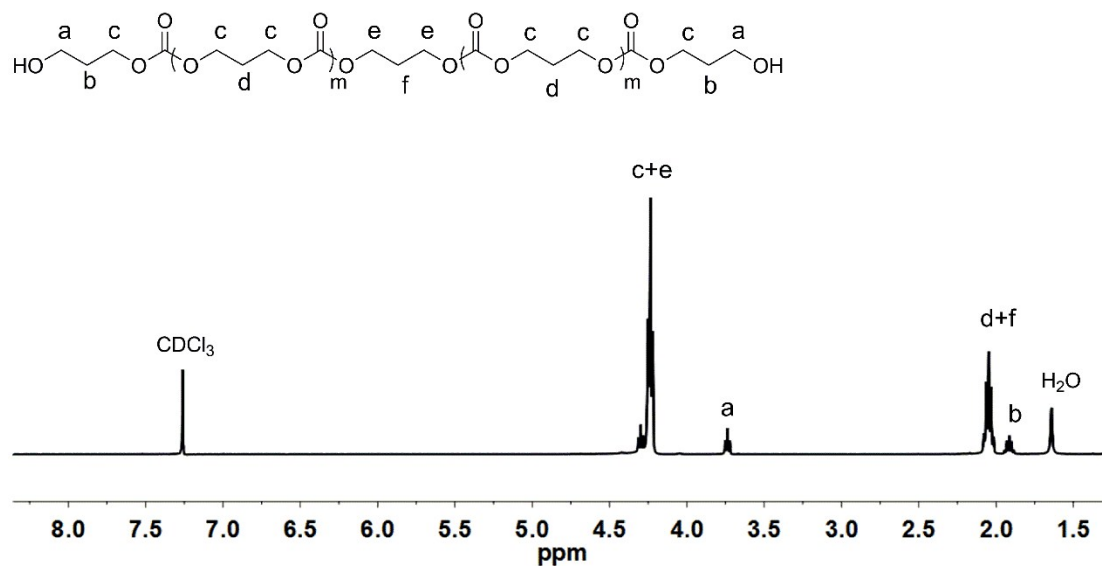

Figure S1.  $^1\text{H}$  NMR spectrum of  $\alpha,\omega$ -dihydroxy telechelic PTMC initiated from 1,3-propanediol in CDCl<sub>3</sub>.

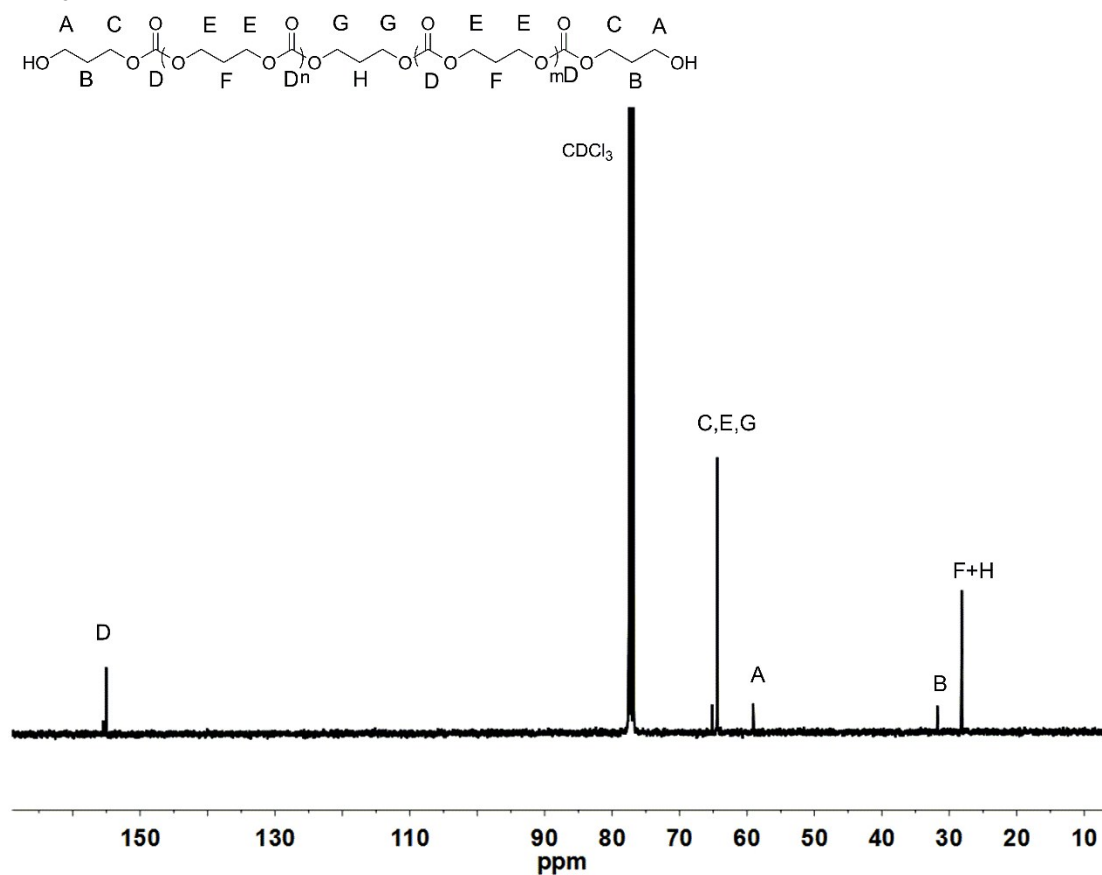

Figure S2.  $^{13}\text{C}$  NMR spectrum of  $\alpha,\omega$ -dihydroxy telechelic PTMC initiated from 1,3-propanediol in CDCl<sub>3</sub>.

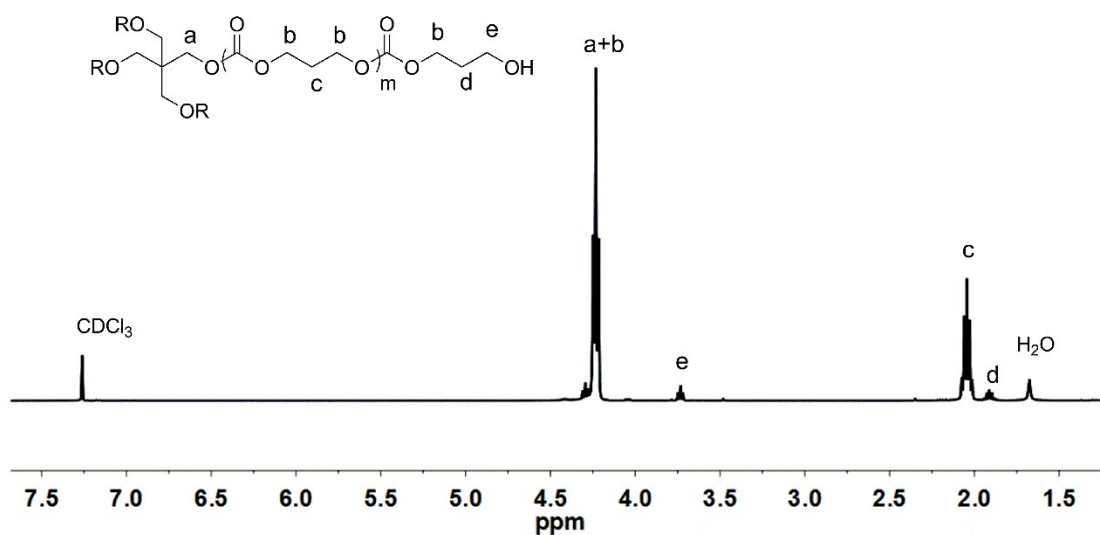

Figure S3  $^1\text{H}$  NMR spectrum of star-shaped PTMC initiated from pentaerythritol in CDCl<sub>3</sub>.

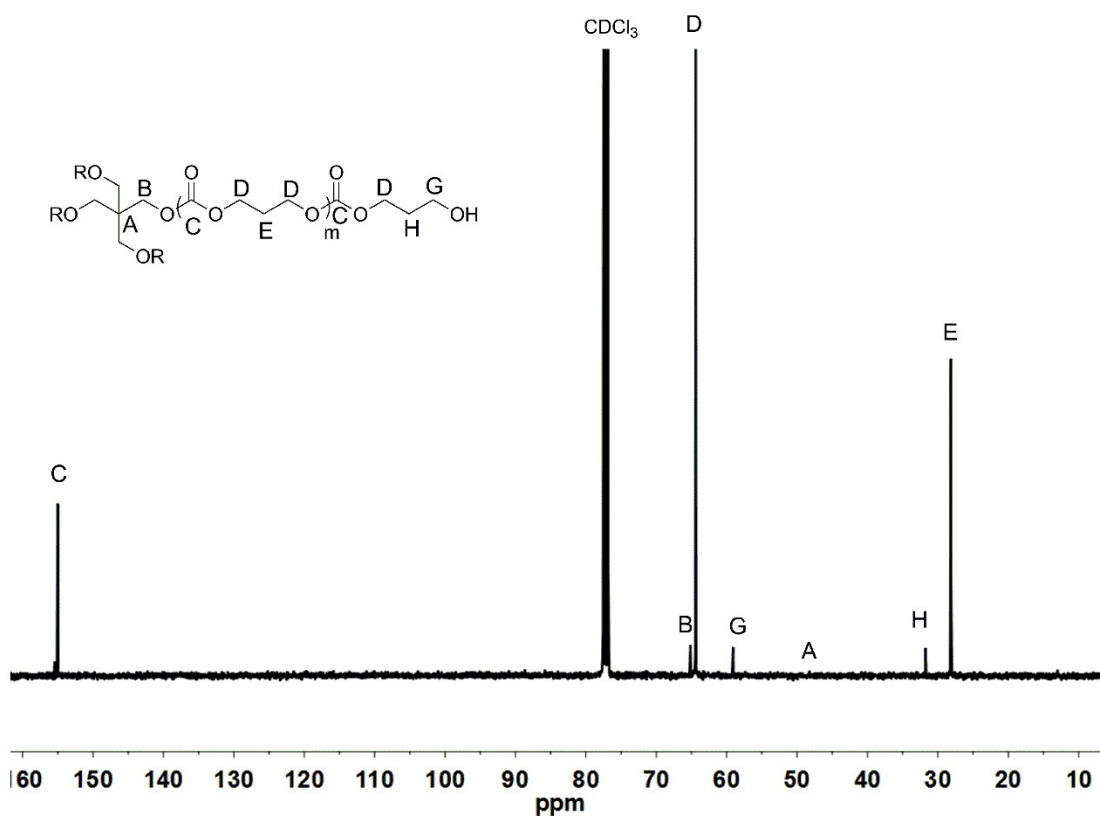

Figure S4  $^{13}\text{C}$  NMR spectrum of star-shaped PTMC initiated from pentaerythritol in CDCl<sub>3</sub>.

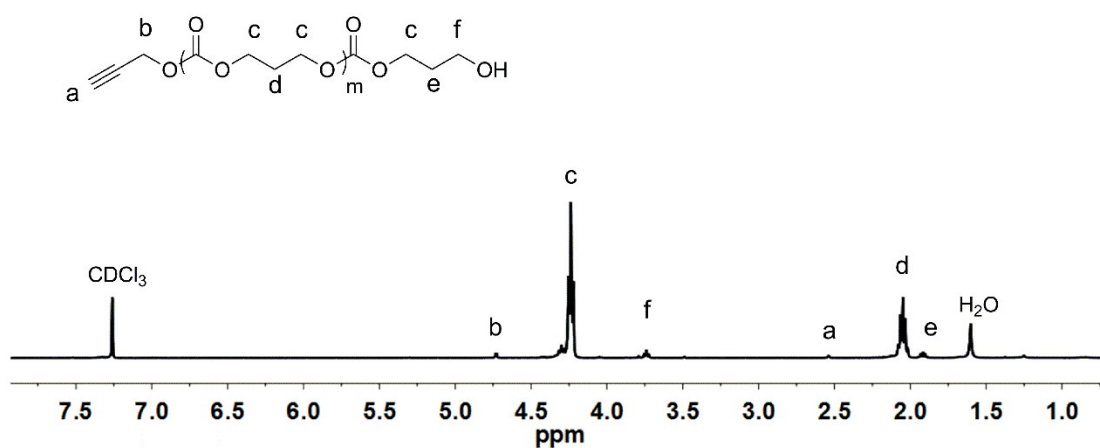

Figure S5 <sup>1</sup>H NMR spectrum of end-functionalized PTMC initiated from propargyl alcohol in CDCl<sub>3</sub>.

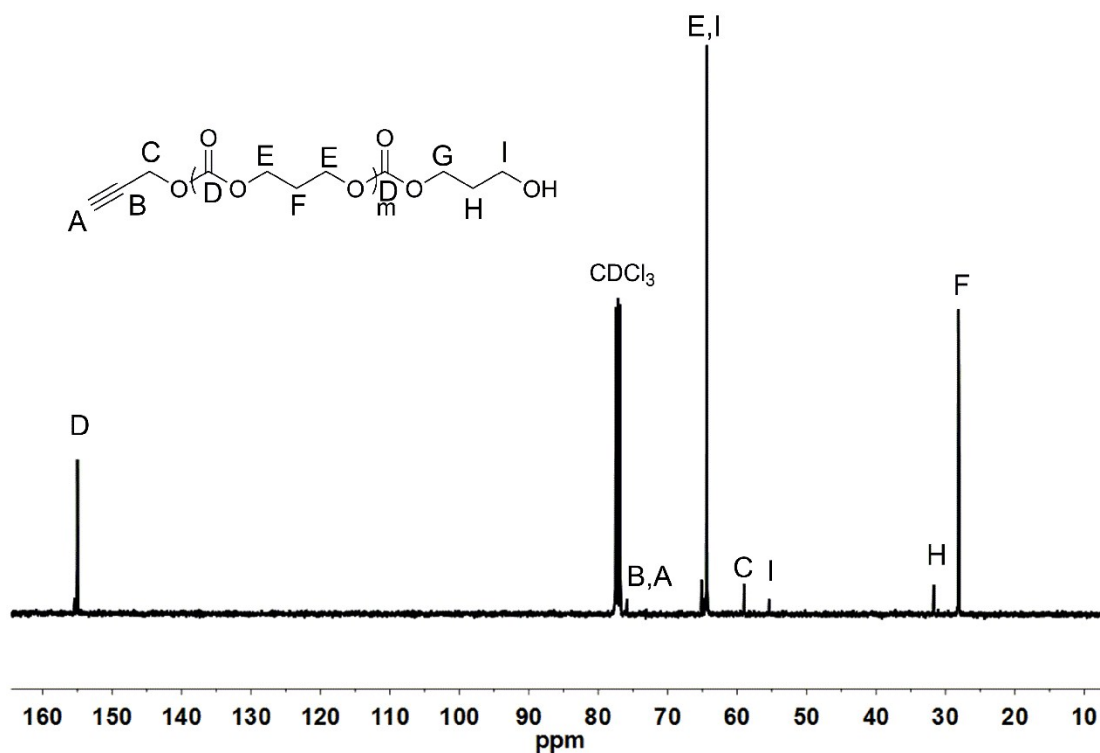

Figure S6. <sup>13</sup>C NMR spectrum of end-functionalized PTMC initiated from propargyl alcohol in CDCl<sub>3</sub>.

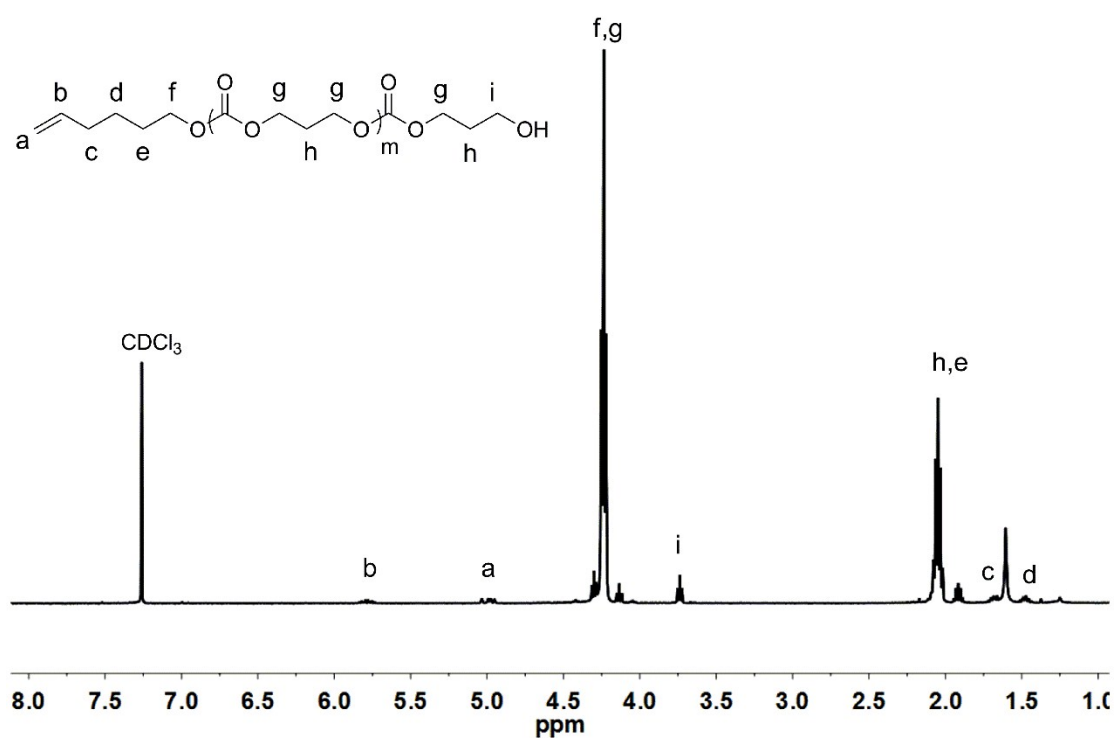

Figure S7. <sup>1</sup>H NMR spectrum of end-functionalized PTMC initiated from 5-hexen-1-ol in CDCl<sub>3</sub>.

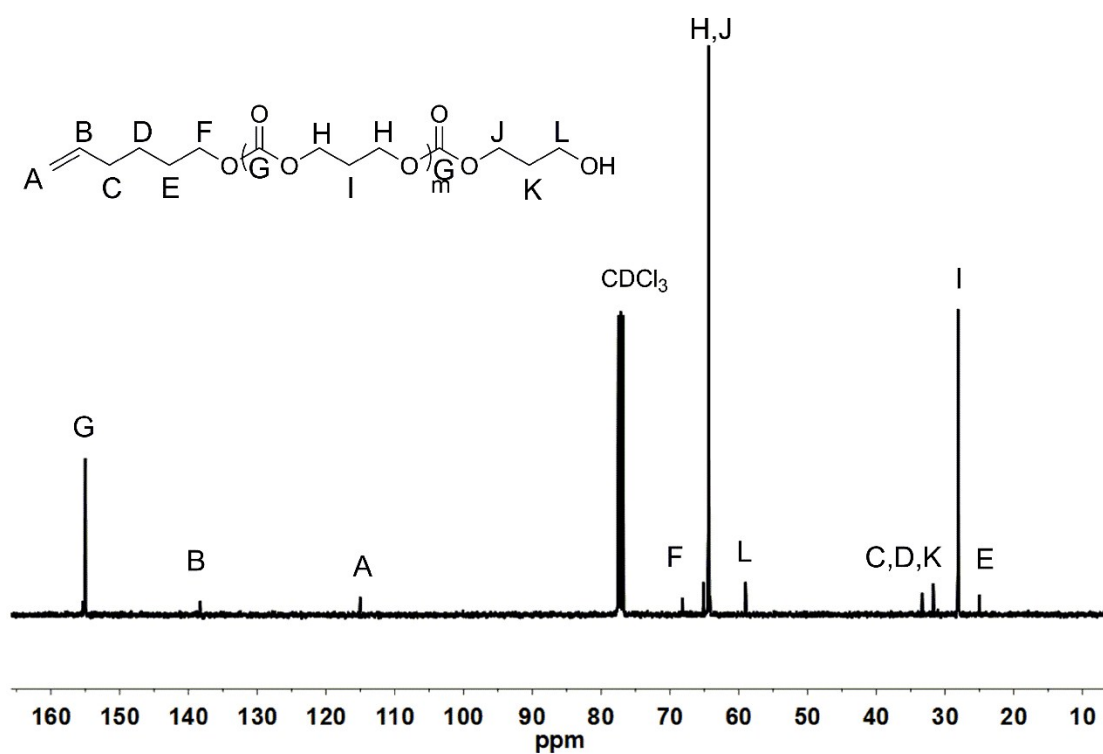

Figure S8. <sup>13</sup>C NMR spectrum of end-functionalized PTMC initiated from 5-hexen-1-ol in CDCl<sub>3</sub>.

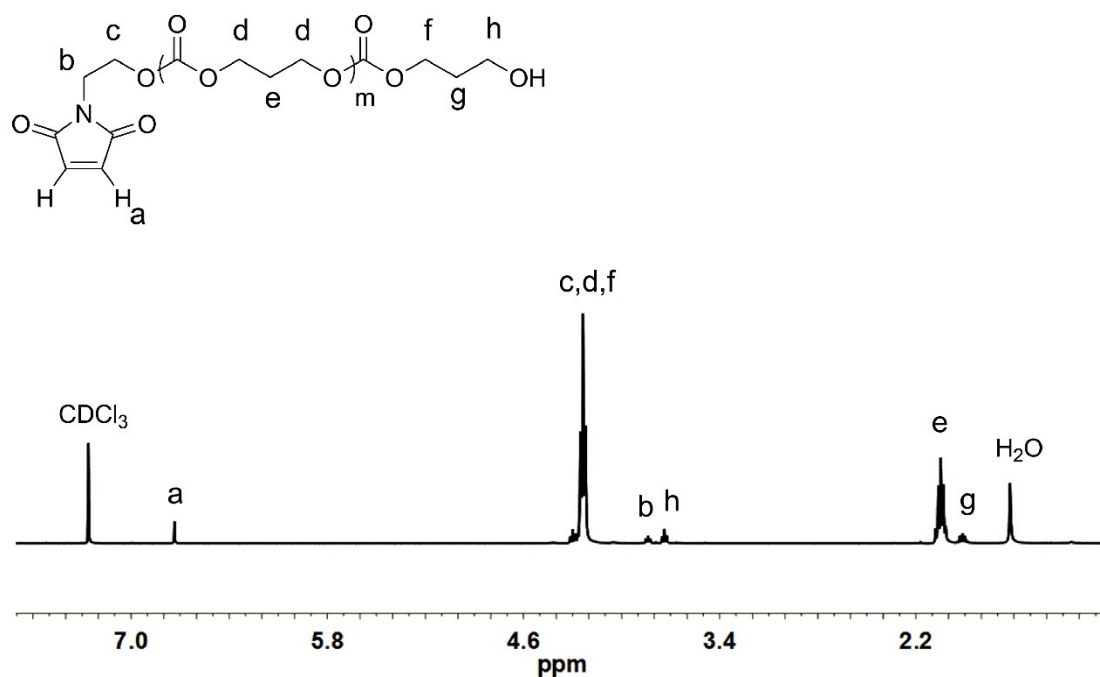

Figure S9.  $^1\text{H}$  NMR spectrum of end-functionalized PTMC initiated from N-(2-hydroxyethyl)maleimide in  $\text{CDCl}_3$ .

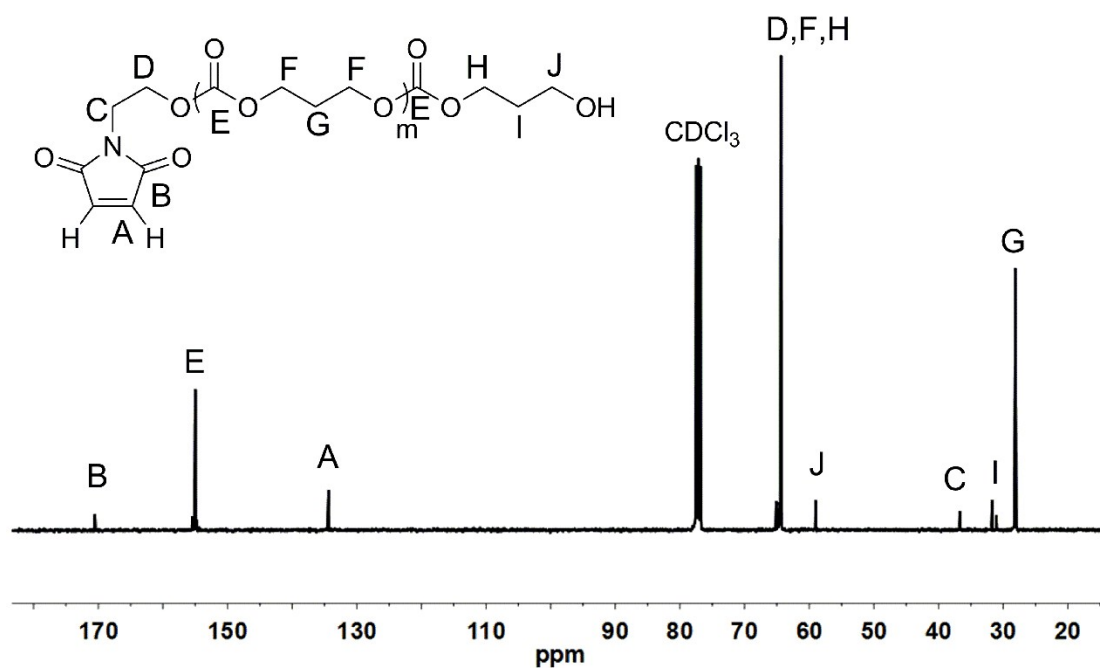

Figure S10.  $^{13}\text{C}$  NMR spectrum of end-functionalized PTMC initiated from N-(2-hydroxyethyl)maleimide in  $\text{CDCl}_3$ .

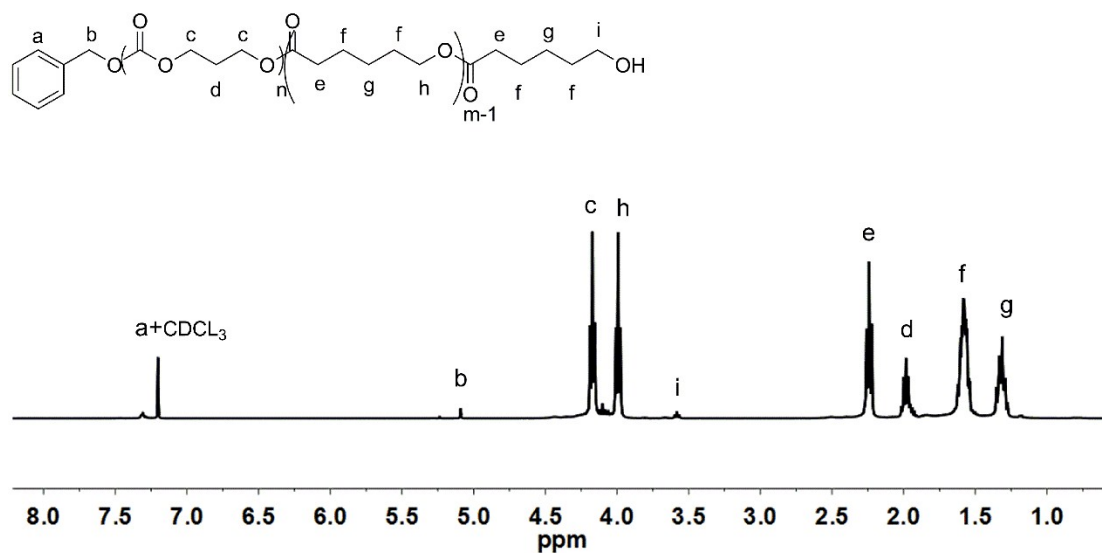

Figure S11. <sup>1</sup>H NMR spectrum of PTMC-*b*-PCL initiated from BnOH in CDCl<sub>3</sub>.

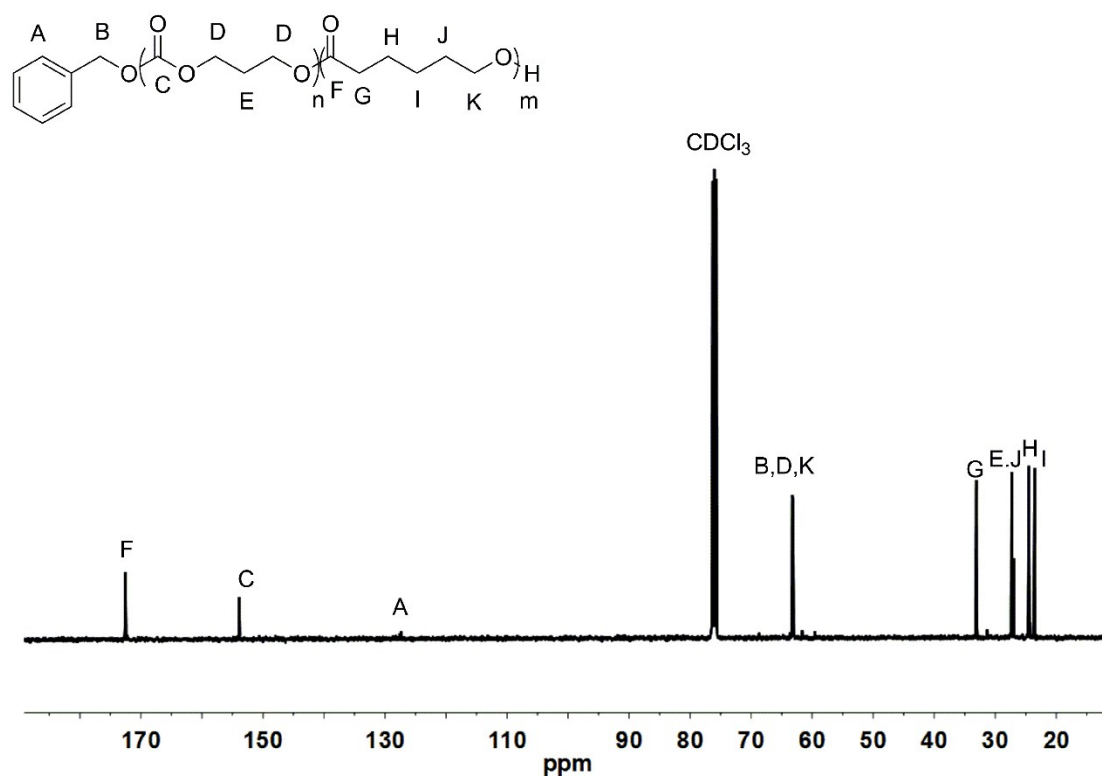

Figure S12. <sup>13</sup>C NMR spectrum of PTMC-*b*-PCL initiated from BnOH in CDCl<sub>3</sub>.

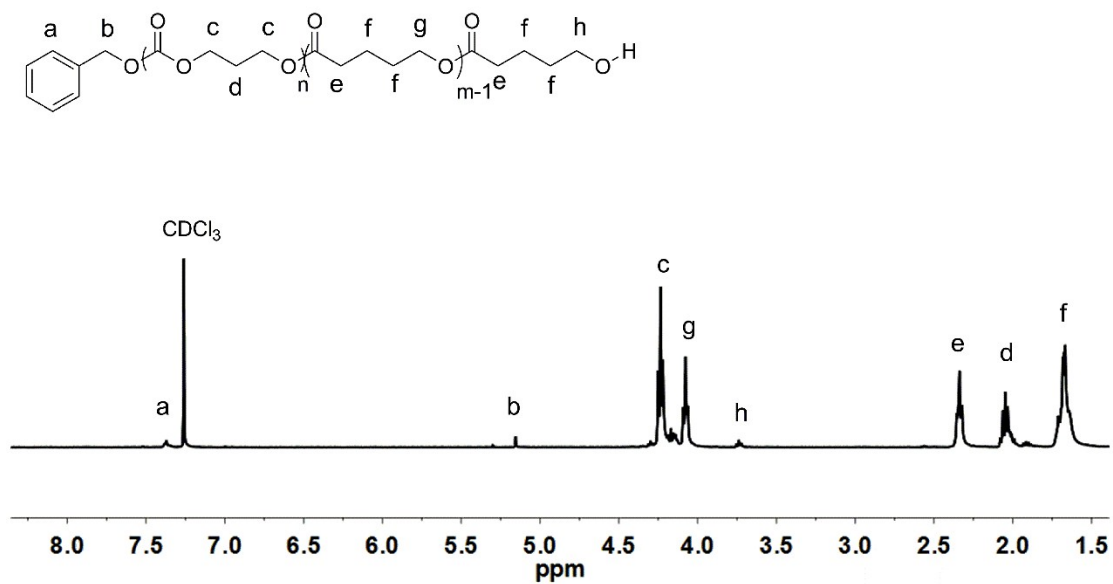

Figure S13. <sup>1</sup>H NMR spectrum of PTMC-*b*-PVL initiated from BnOH in CDCl<sub>3</sub>.

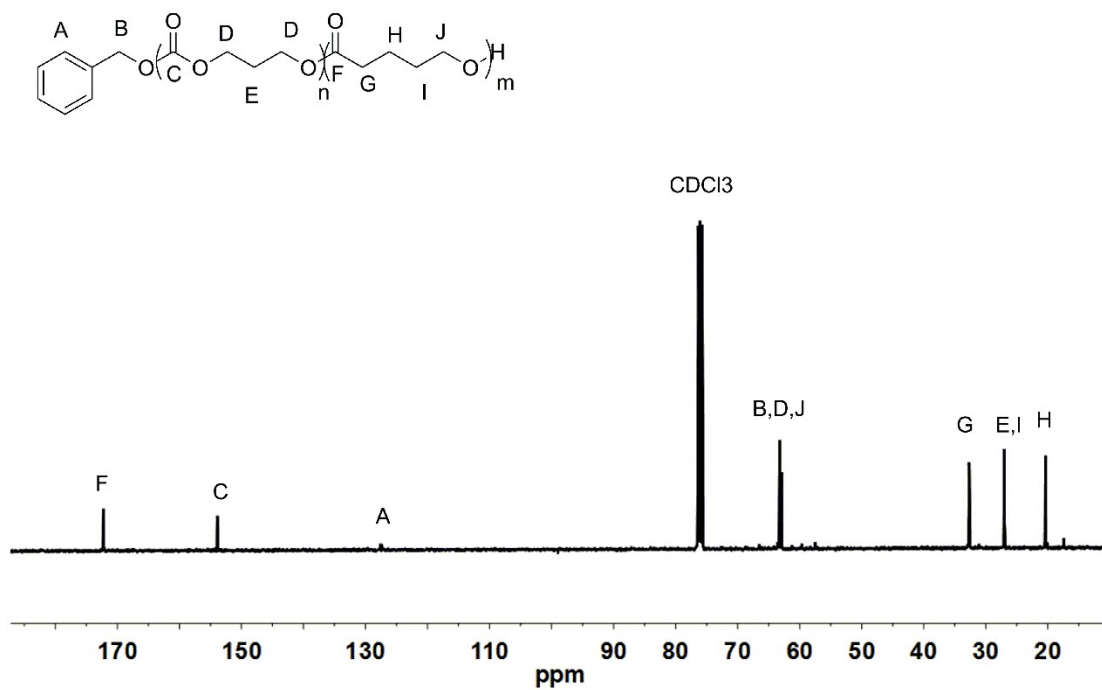

Figure S14. <sup>13</sup>C NMR spectrum of PTMC-*b*-PVL initiated from BnOH in CDCl<sub>3</sub>.



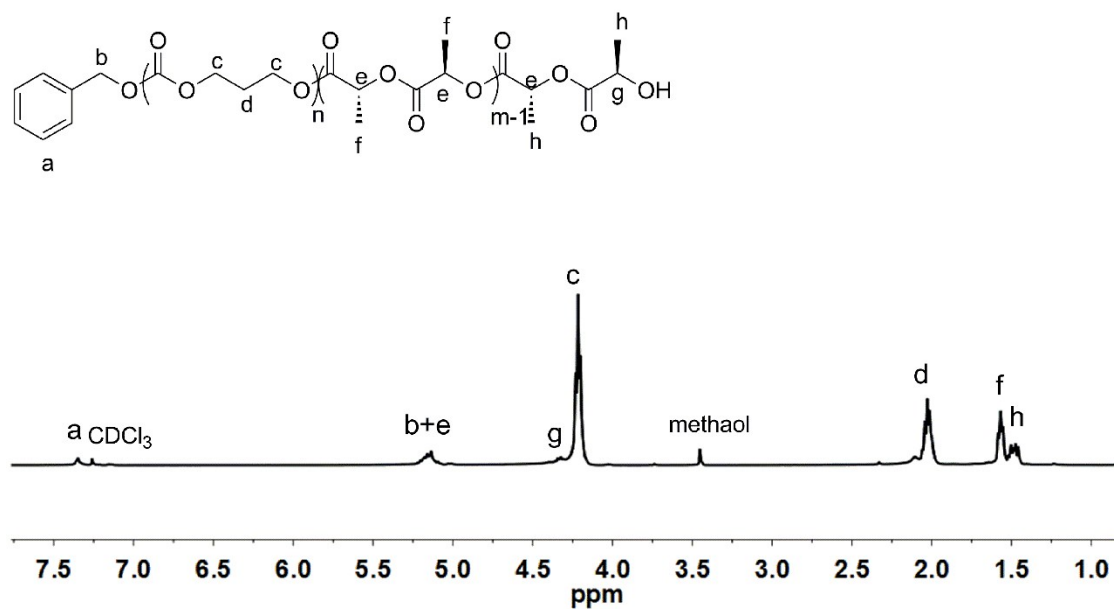

Figure S15. <sup>1</sup>H NMR spectrum of PTMC-*b*-PLLA initiated from BnOH in CDCl<sub>3</sub>.

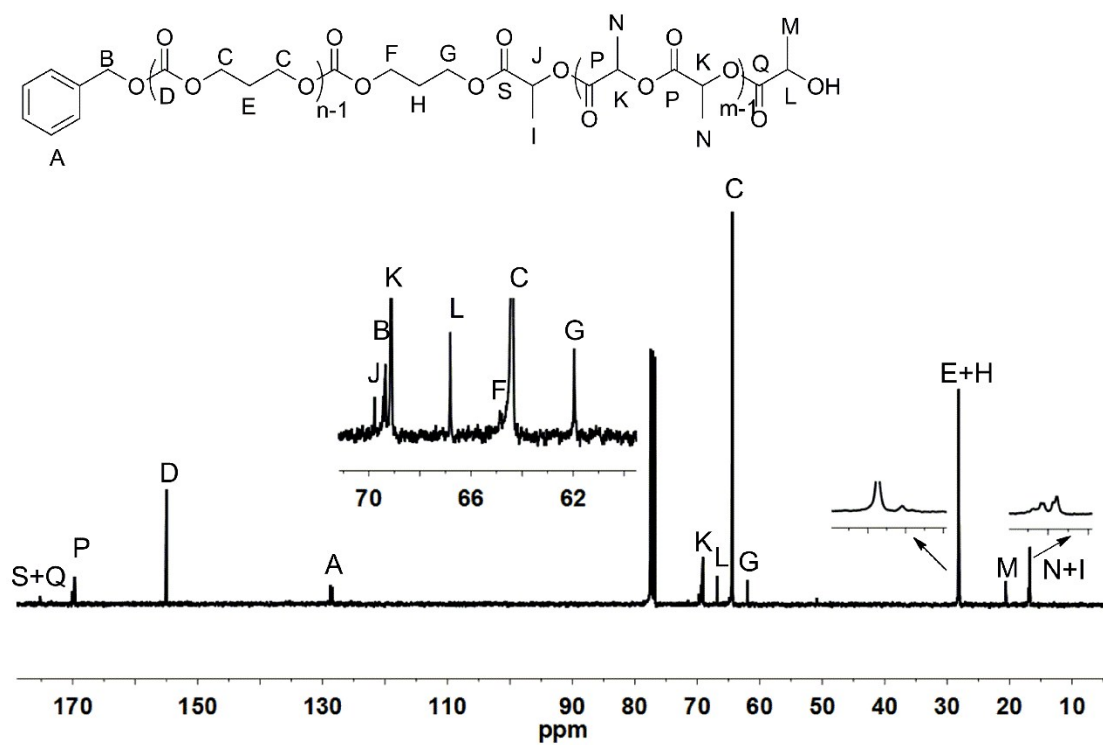

Figure S16. <sup>13</sup>C NMR spectrum of PTMC-*b*-PLLA initiated from BnOH in CDCl<sub>3</sub>.
